# Supplementary material
Source: PubMed Central journal article supplement (PMC2758616)
Supplement: NIHMS126535-supplement.pdf [file NIHMS126535-supplement.pdf]

## SUPPLEMENTAL MATERIAL

**Supplementary Table I.** AAA phenotype in complement-deficient mice

| Genotype                  | Increase in AD (mm) | Increase in AD (%) | Phenotype   |
|---------------------------|---------------------|--------------------|-------------|
| WT                        | 0.82 ± 0.01         | 156 ± 2            | Susceptible |
| WT + CVF                  | 0.47 ± 0.02         | 90 ± 4             | Resistant   |
| C4 <sup>-/-</sup>         | 0.81 ± 0.02         | 163 ± 5            | Susceptible |
| fB <sup>-/-</sup>         | 0.51 ± 0.02         | 105 ± 4            | Resistant   |
| C5 <sup>-/-</sup>         | 0.70 ± 0.06         | 136 ± 13           | Susceptible |
| C3 <sup>-/-</sup>         | 0.67 ± 0.05         | 133 ± 9            | Susceptible |
| C3 <sup>-/-</sup> + C5aRA | 0.37 ± 0.04         | 78 ± 8             | Resistant   |

Mice underwent elastase perfusion in the absence or presence of CVF pre-treatment or C5aRA. Aortic diameter (AD) measurements were obtained prior to elastase perfusion and increase in AD on day 14 is presented as absolute difference (in mm) or as % increase over pre-perfused measurements.
